# Supplementary material for: Ursodeoxycholate Restores Biliary Excretion of Methotrexate in Rats with Ethinyl Estradiol Induced-Cholestasis by Restoring Canalicular Mrp2 Expression
Source: PubMed Central journal article supplement (PMC5979538; doi:10.3390/ijms19041120), 2018-04-09
Supplement: ijms-19-01120-s001.pdf [file ijms-19-01120-s001.pdf]

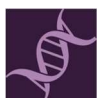

# Supplementary Materials: Ursodeoxycholate Restores Biliary Excretion of Methotrexate in Rats with Ethinyl Estradiol Induced-Cholestasis by Restoring Canalicular Mrp2 Expression

Min Ju Kim <sup>1,2</sup>, Yun Ju Kang <sup>3</sup>, Mihwa Kwon <sup>3</sup>, Young A. Choi <sup>4</sup>, Min-Koo Choi <sup>4</sup>, Hye-Young Chi <sup>1</sup>, Hye Hyun Yoo <sup>2</sup>, Chang-Koo Shim <sup>1</sup> and Im-Sook Song <sup>3,\*</sup>

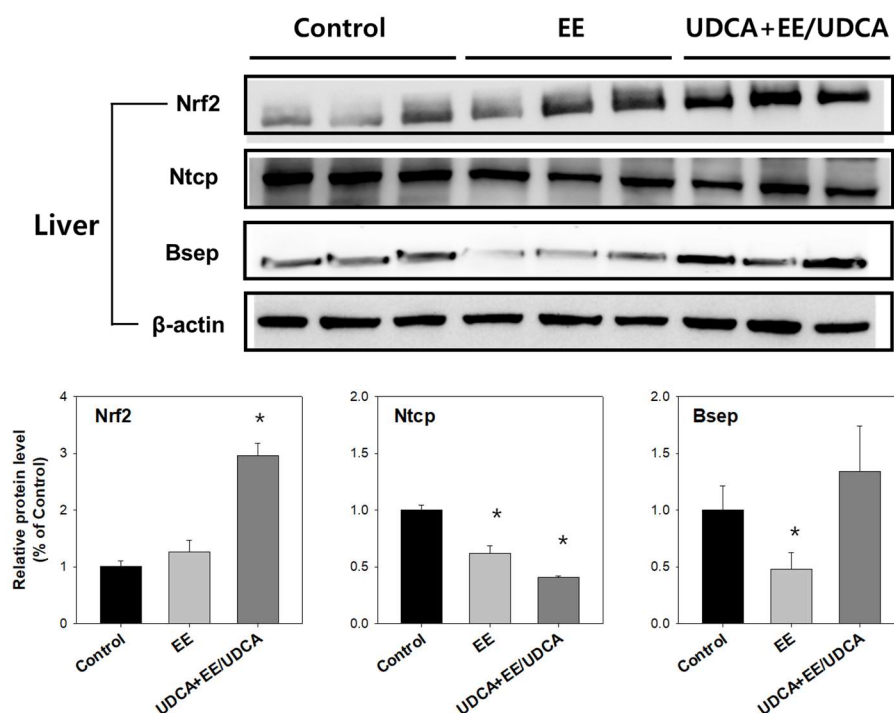

**Figure S1.** Protein expression level of Nrf2, Ntcp, and Bsep in the liver from control, EE and UDCA + EE/UDCA groups. Lanes were loaded liver lysates, which was prepared from three different rats per group.  $\beta$ -actin served as a loading control. Quantitative analyses of the western blot results are shown in the lower panel. Each bar represents the mean  $\pm$  SD. \*  $p < 0.05$ , significant compared with control group by Student's  $t$ -test.
